# Supplementary material for: The role of oxygen in dramatically enhancing the electrical properties of solution-processed Zn–Sn–O thin-film transistors
Source: Royal Society of Chemistry journal article supplement (doi:10.1039/c7tc01190c), 2017-01-01
Supplement: c7tc01190c1.pdf [file c7tc01190c1.pdf]

## Supporting Information

### **Role of oxygen in dramatically enhancing the electrical properties of solution-processed Zn-Sn-O thin-film transistors**

Soyeon Cho,<sup>a</sup> Jong-Heon Yang,<sup>a</sup> Jong Gyu Oh,<sup>b</sup> Sung-Haeng Cho,<sup>a</sup> Chi-Sun Hwang,<sup>a</sup> Jaeyoung Jang,<sup>b</sup> and Sooji Nam<sup>\*a</sup>

<sup>a</sup>Realistic Display Research Group, Electronics and Telecommunications Research Institute (ETRI), Daejeon, 34129, Korea

\*E-mail: [sjnam15@etri.re.kr](mailto:sjnam15@etri.re.kr)

<sup>b</sup>Department of Energy Engineering, Hanyang University, Seoul 04763, Republic of Korea

**Keywords: Indium-free; solution-process; metal oxide thin-film transistors; new Sn precursor; oxygen annealing**

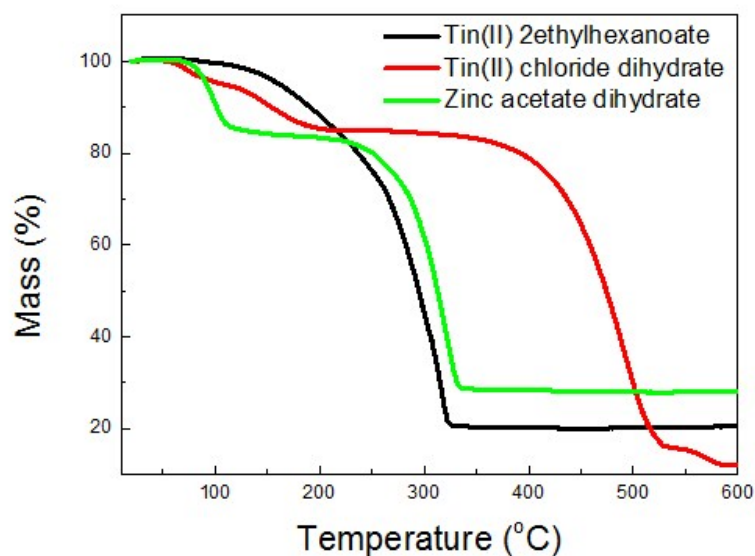

**Fig. S1** Thermogravimetric analysis (TGA) measurement obtained with the tin (II) 2-ethylhexanoate, tin (II) chloride and zinc acetate dehydrate as precursors.

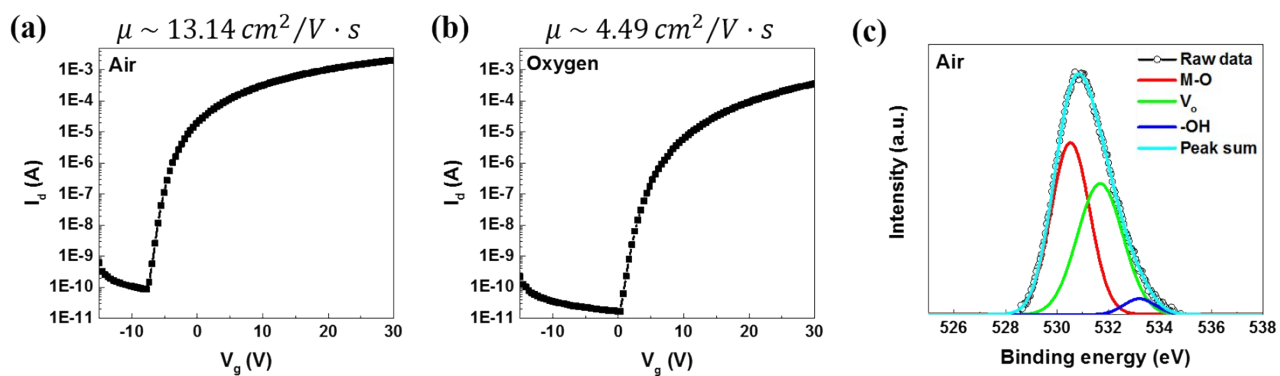

**Fig. S2** Transfer characteristics of the Zn-Sn-O TFTs using tin (II) chloride with (a) air annealing and (b) oxygen annealing at 500 °C for 2 h, and (c) deconvoluted O 1s XPS peaks of a Zn-Sn-O TFT using tin (II) chloride annealed in an air environment.

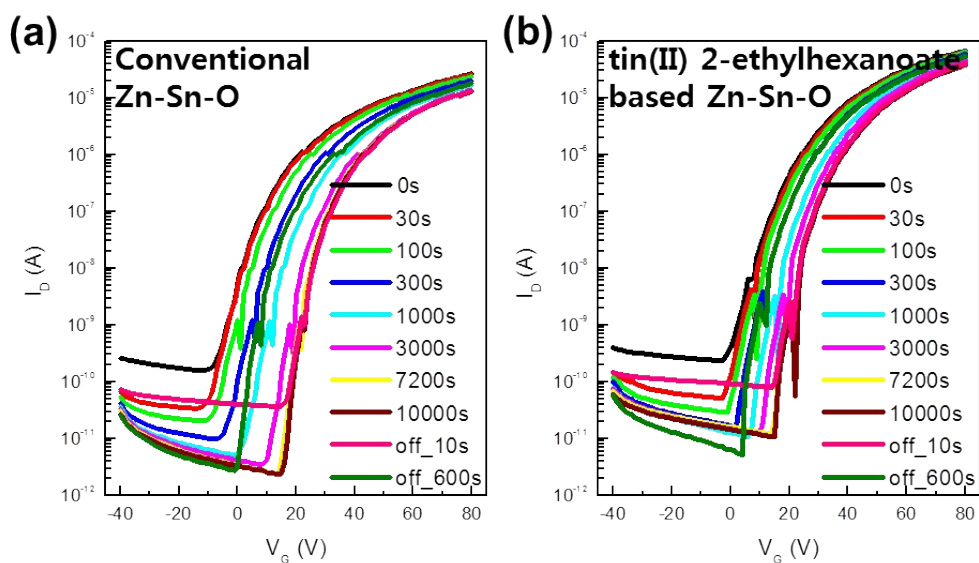

**Fig. S3** Time-dependent transfer characteristics of (a) tin (II) chloride based Zn-Sn-O device and (b) tin(II) 2-ethylhexanoate based Zn-Sn-O device under a gate bias stress of  $V_g = +20$  V at  $60^\circ\text{C}$  ( $V_d = 10$  V).

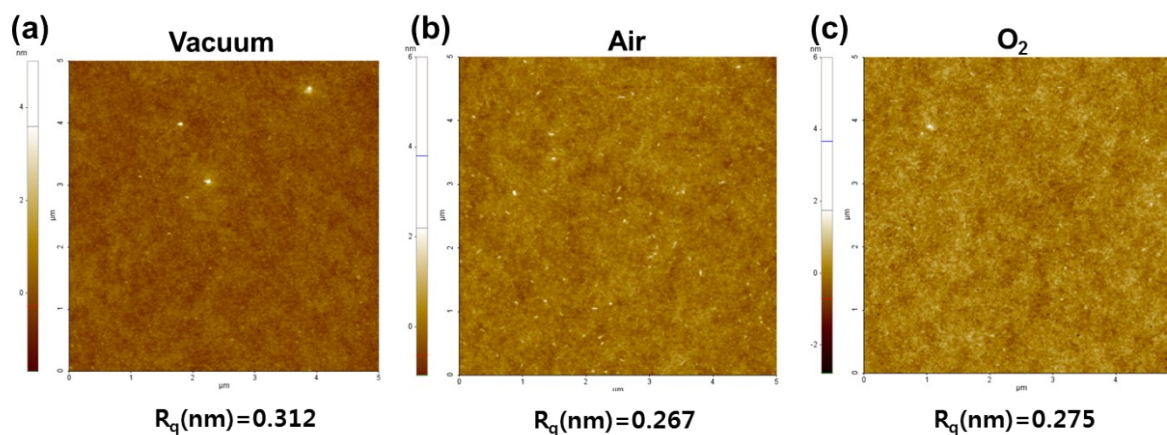

**Fig. S4** Atomic force microscopy (AFM) images of tin(II) 2-ethylhexanoate based Zn-Sn-O films annealed at  $500^\circ\text{C}$  in vacuum (a), air (b), and oxygen (c).  $R_q$  means the root mean square roughness value.

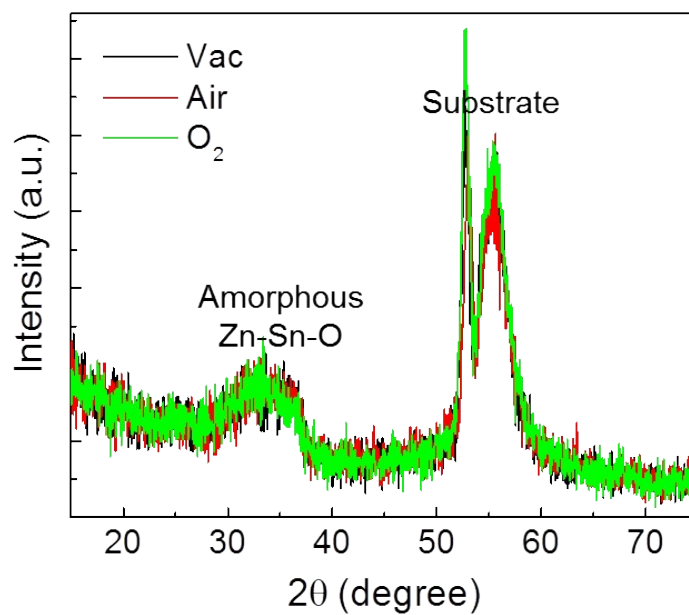

**Fig. S5** High resolution X-ray diffraction (XRD) patterns of tin(II) 2-ethylhexanoate based Zn-Sn-O films annealed at 500 °C in vacuum, air, and oxygen. The incident angle is 1° and the peaks around 55 ° are substrate artifact.
